# Supplementary material for: SPASS – new gridded climatological snow datasets for Switzerland: Potential and limitations
Source: Copernicus journal article supplement (doi:10.5194/egusphere-2025-413), 2025-02-18
Supplement: Supplementary file 1 [file egusphere-2025-413-supplement.pdf]

10 Supplement

580 10.1 Additional Tables

**Table S1: List of stations and corresponding altitude used for comparison in each elevation band. Station with a number at the beginning or end of the listed station indicatives are maintained by SLF and stations without any number are maintained by MeteoSwiss.**

| 250 – 750 m |      | 751-1250 m |      | 1251-1750 m |      | 1751-2250 m |      | 2251-2750 m |      |
|-------------|------|------------|------|-------------|------|-------------|------|-------------|------|
| Stat        | Alti | Stat       | Alti | Stat        | Alti | Stat        | Alti | Stat        | Alti |
| BAS         | 316  | LAG        | 755  | 5SI         | 1273 | 7SD         | 1751 | TUJ2        | 2262 |
| OTL         | 366  | 1LB        | 800  | 2ST         | 1280 | 7SN         | 1752 | BOG2        | 2299 |
| GVE         | 410  | 7BR        | 800  | 1WE         | 1280 | 2TR         | 1780 | CMA2        | 2325 |
| DEM         | 416  | STG        | 802  | 1LS         | 1300 | 4SF         | 1790 | NAS2        | 2350 |
| SNS         | 439  | 5KU        | 815  | 3BR         | 1310 | 6RI         | 1800 | JUL2        | 2426 |
| ALT         | 449  | EIN        | 910  | 3FB         | 1310 | SIA         | 1801 | GOM3        | 2427 |
| KOP         | 483  | ELM        | 965  | 1MI         | 1320 | 7MA         | 1810 | PMA2        | 2429 |
| NEU         | 483  | CHD        | 985  | 2ME         | 1320 | 1HB         | 1825 | EGH2        | 2500 |
| SIO         | 485  | 7PV        | 1015 | 1AD         | 1325 | 5AR         | 1845 | 5WJ         | 2536 |
| LAN         | 538  | 2EN        | 1023 | 3UI         | 1340 | 7MZ         | 1850 | ATT2        | 2550 |
| BER         | 548  | GTT        | 1055 | 4UL         | 1345 | 1GH         | 1970 | DIA2        | 2569 |
| CHU         | 572  | 2OG        | 1060 | 1LC         | 1360 | 4SH         | 2000 | ANV3        | 2589 |
| MER         | 592  | ROB        | 1078 | 7ST         | 1387 | 7DI         | 2090 | VIN2        | 2729 |
| SMA         | 604  | AIR        | 1139 | 1SM         | 1390 | 7AG         | 2090 | LAG2        | 2730 |
| VIS         | 662  | 2SO        | 1150 | 4MS         | 1430 |             |      |             |      |
| MAS         | 718  | D1S        | 1190 | 2AN         | 1440 |             |      |             |      |
|             |      | 1GS        | 1190 | 4WI         | 1450 |             |      |             |      |
|             |      | 1GA        | 1190 | 5SP         | 1457 |             |      |             |      |
|             |      | 5KK        | 1190 | 5IN         | 1460 |             |      |             |      |
|             |      | 3MG        | 1190 | 5SA         | 1510 |             |      |             |      |
|             |      | 6CB        | 1215 | 6BG         | 1525 |             |      |             |      |
|             |      |            |      | 5DF         | 1560 |             |      |             |      |
|             |      |            |      | 4GR         | 1560 |             |      |             |      |
|             |      |            |      | 1GB         | 1565 |             |      |             |      |
|             |      |            |      | 4MO         | 1590 |             |      |             |      |
|             |      |            |      | 4ZE         | 1600 |             |      |             |      |
|             |      |            |      | 6SB         | 1640 |             |      |             |      |
|             |      |            |      | 1MR         | 1650 |             |      |             |      |
|             |      |            |      | 4BP         | 1670 |             |      |             |      |
|             |      |            |      | 7CA         | 1690 |             |      |             |      |
|             |      |            |      | 7ZU         | 1710 |             |      |             |      |
|             |      |            |      | 7FA         | 1710 |             |      |             |      |
|             |      |            |      | 7LD         | 1710 |             |      |             |      |
|             |      |            |      | 5ZV         | 1735 |             |      |             |      |

**Table S2: Number of available stations in the two different comparison periods, as well as the number of grid points in absolute and relative terms per elevation band.**

| Label    | Elevation band | # of stations<br>1999-2023 | # of stations<br>1962-2023 | # of grid<br>points | % of grid<br>points |
|----------|----------------|----------------------------|----------------------------|---------------------|---------------------|
| < 250 m  |                |                            |                            | 72                  | 0.2                 |
| 500 m    | 250-750 m      | 16                         | 16                         | 13405               | 34                  |
| 1000 m   | 751-1250 m     | 21                         | 21                         | 8056                | 20                  |
| 1500 m   | 1251-1750 m    | 34                         | 34                         | 5880                | 15                  |
| 2000 m   | 1751-2250 m    | 16                         | 16                         | 5592                | 14                  |
| 2500 m   | 2251-2750 m    | 16                         | 1                          | 4731                | 12                  |
| > 2750 m |                |                            |                            | 2105                | 5                   |

590

### 10.2 Additional Figures

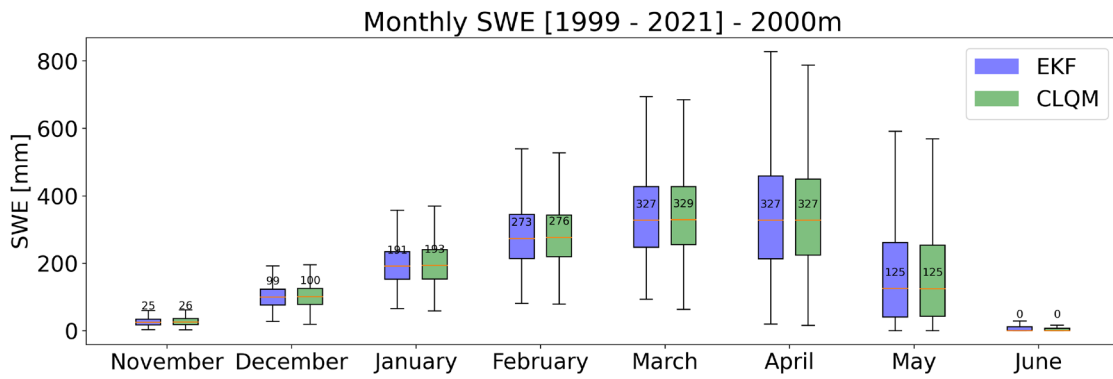

595

**Figure S1: Climatology of monthly SWE values of OSHD-EKF and OSHD-CLQM in the 2000 m elevation band between the common period 1999- 2001. Numbers in the boxplots indicate monthly median values.**

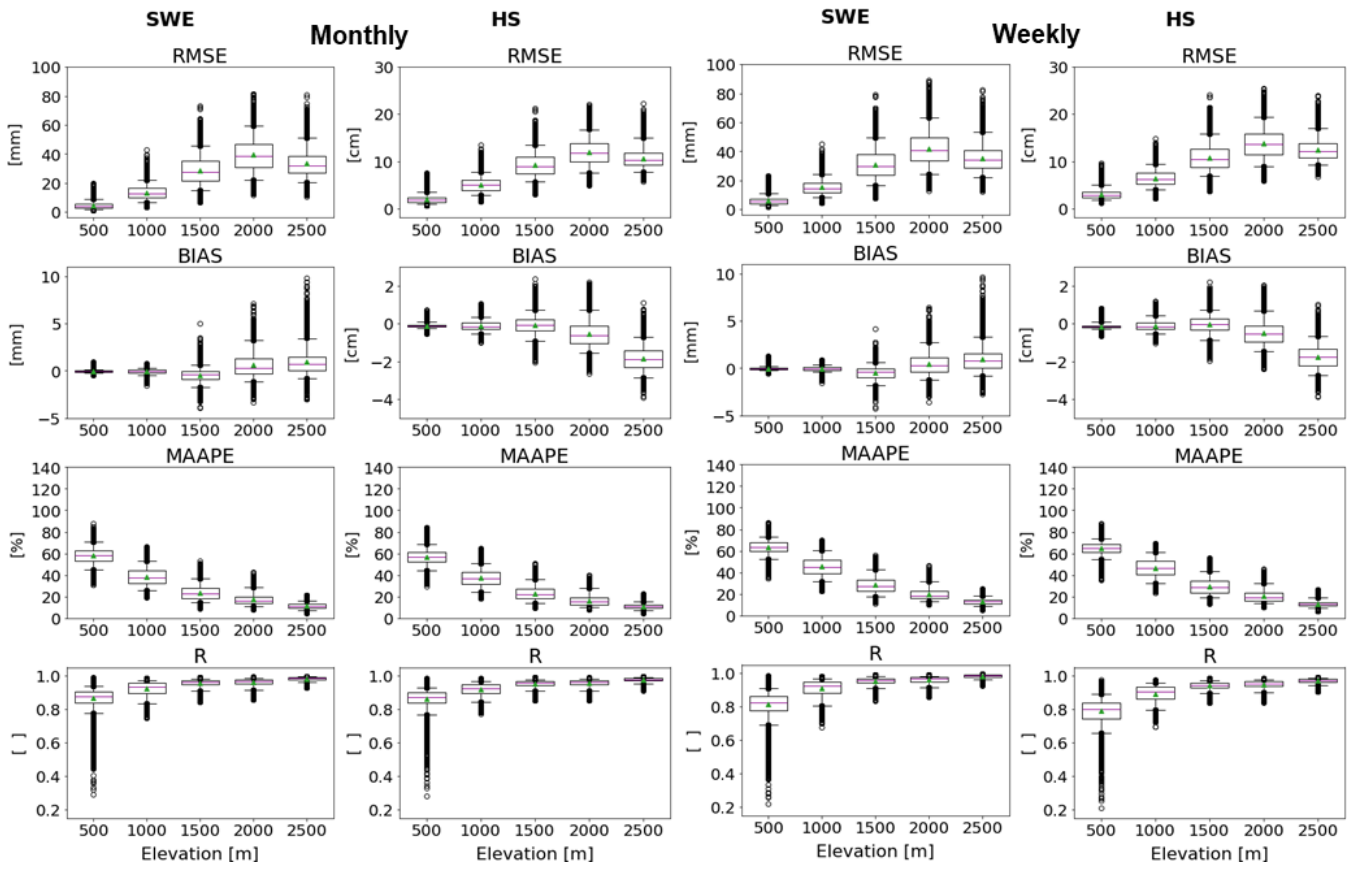

600

Figure S2: Score comparison between models CLQM and EKF ('reference') on a monthly (a,b) and weekly (c,d) resolution at respective elevation bands for SWE (a,c) and HS (b,d). Median value is illustrated as purple line and mean value as green triangle.

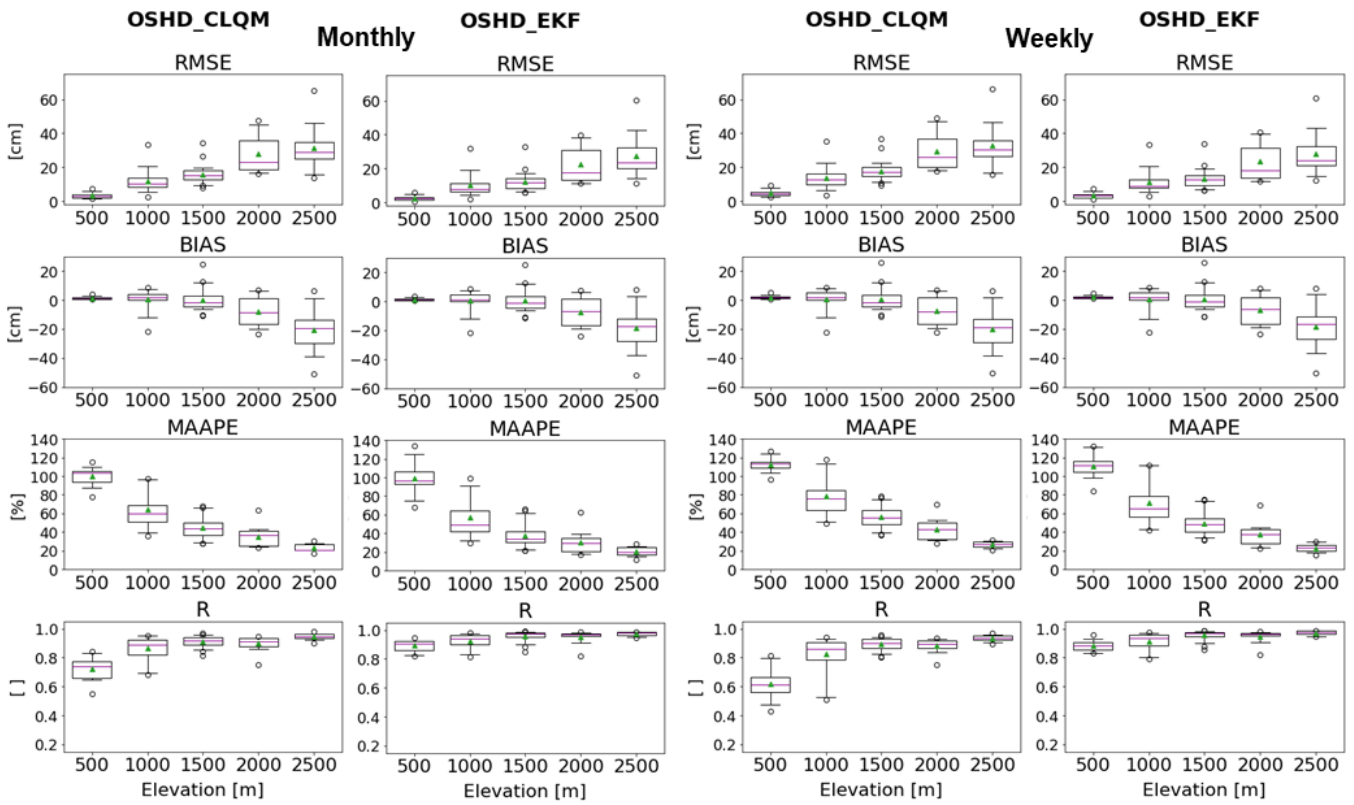

605

Figure S3: Score comparison between stations data and OSHD-CLQM (a,c) as well as OSHD-EKF (b,d) for monthly (a,b) and weekly (c,d) snow depth values in the respective elevation bands. Median value is illustrated as purple line and mean value as green triangle.

610

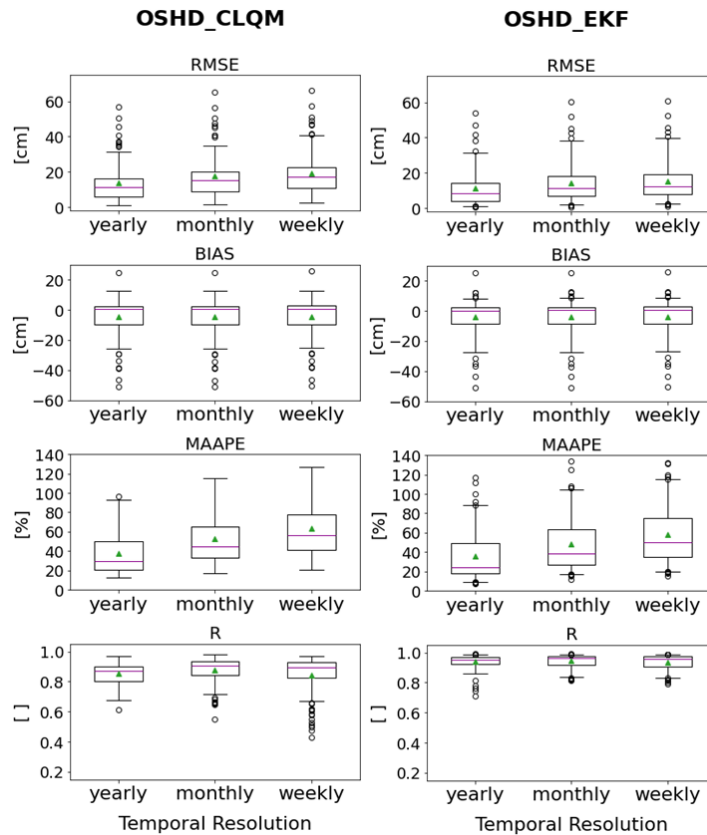

Figure S4: Score comparison between all stations and the respective model gridpoints of OSHD-CLQM (left) and OSHD-EKF (right) for yearly, monthly and weekly snow depth values. Median value is illustrated as purple line and mean value as green triangle.

615

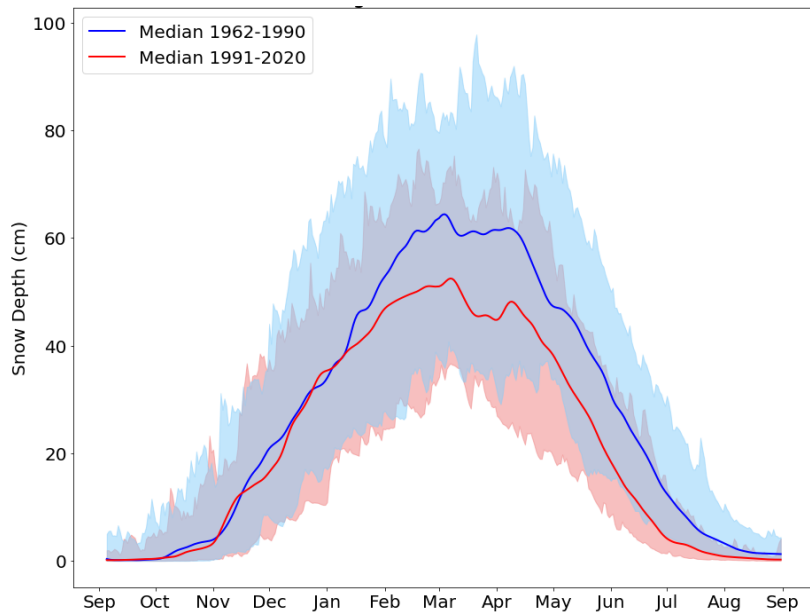

**Figure S5: Annual evolution of snow depth from the OSHD\_CLQM model for the two 30-year reference periods 1962-1990 (blue) and 1991-2020 (red). The daily values are calculated based on all grid points between 0 and 3000 m in Switzerland.**

620

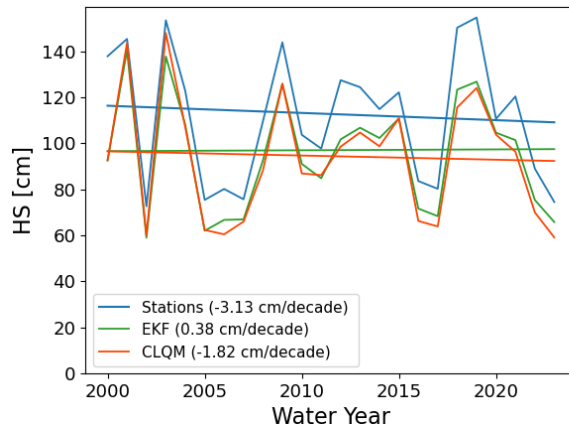

**Figure S6: Trends of yearly snow depth [cm / decade] calculated using Thiel-Sen slopes for the OSHD-CLQM and the OSHD\_EKF, as well as for station measurements (mean of 16 stations) for the highest elevation band (2500 m). Possible significance is indicated with \*  $p < 0.05$ ; \*\*  $p < 0.01$ ; \*\*\*  $p < 0.001$ .**

625

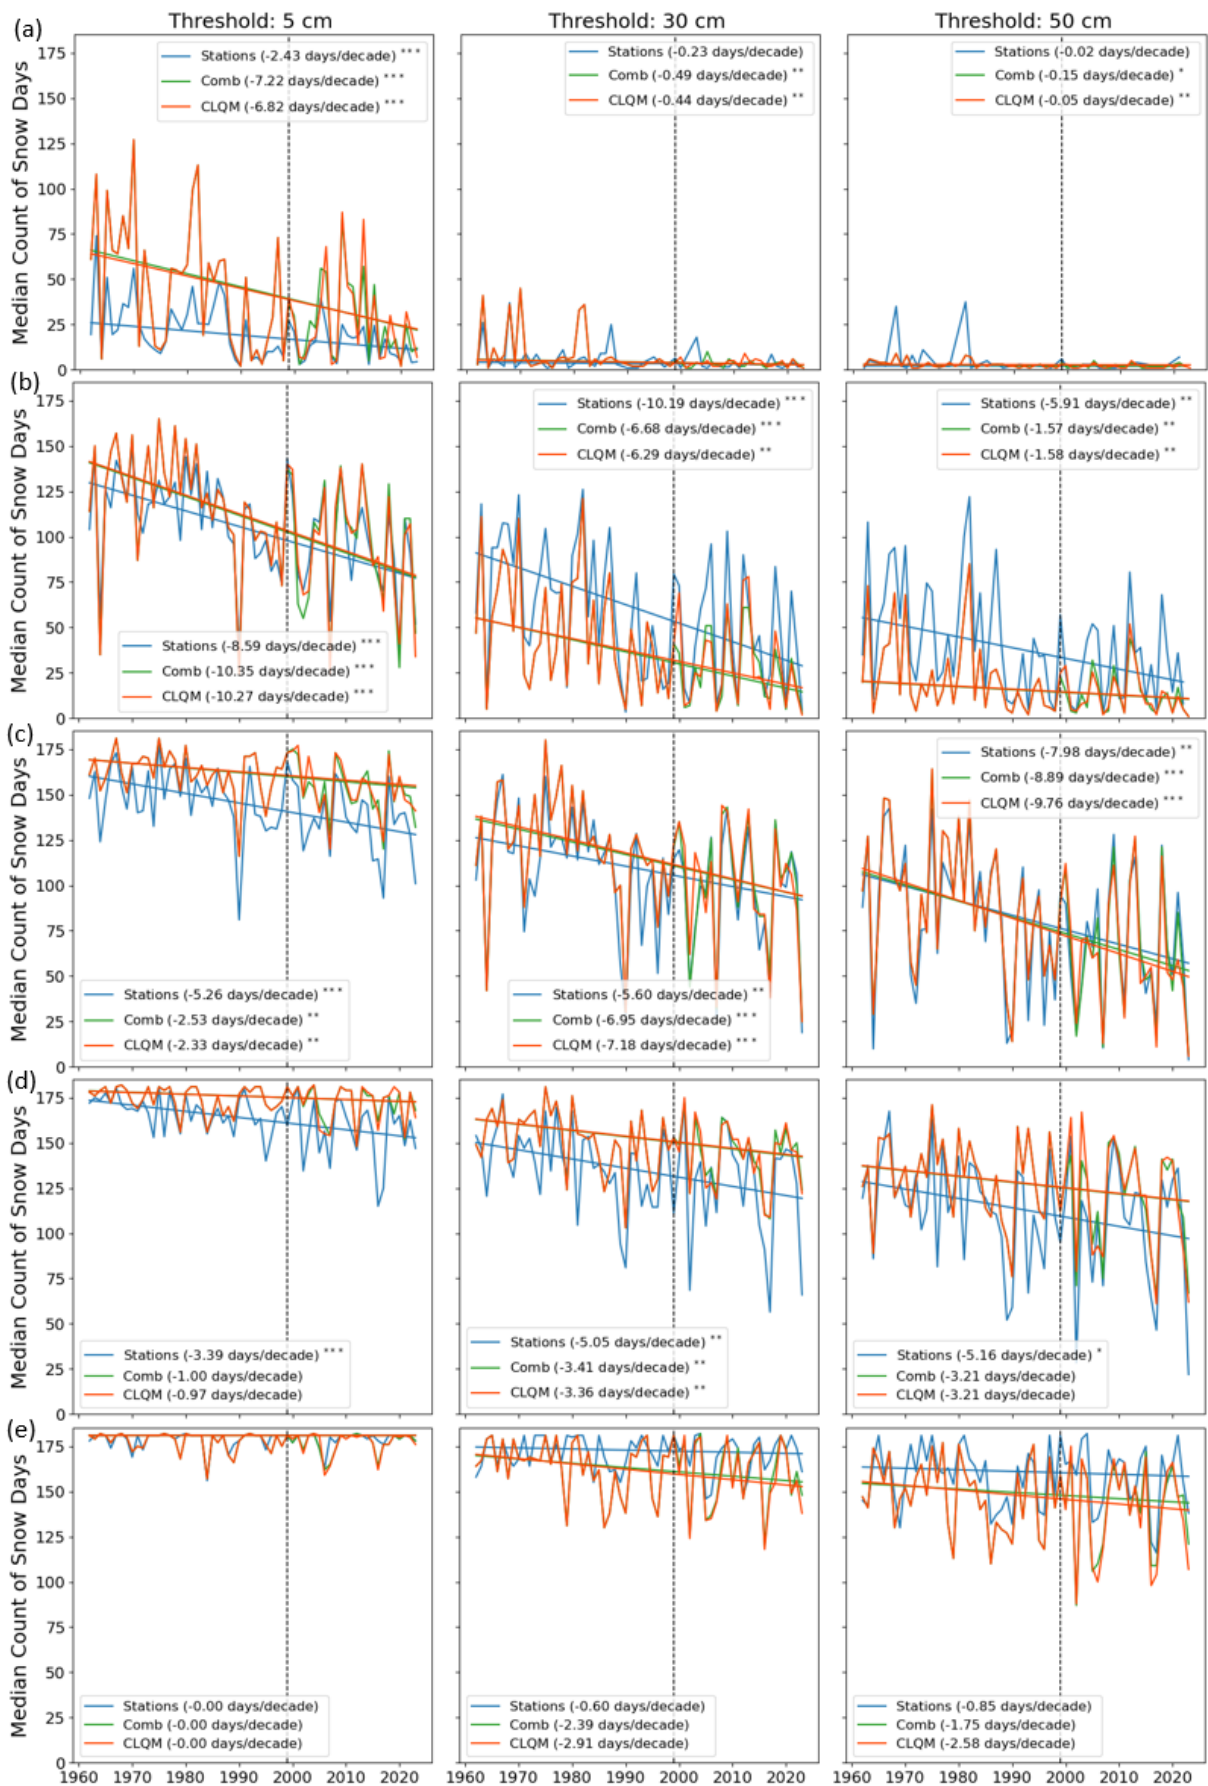

Figure S7: Trends of median snow days for three different thresholds (5,30, 50 cm) using Theil-Sen-slope regression for OSHD-CLQM and OSHD-comb, as well as stations across five elevation bands: (a) 500, (b) 1000, (c) 1500, (d) 2000, and (e) 2500 m. Significance is indicated with \*  $p < 0.05$ ; \*\*  $p < 0.01$ ; \*\*\*  $p < 0.001$ . The dashed line indicates the year 1999, before which the yearly values of OSHD-CLQM and OSHD-comb are the same.
